Word Count: 4602

Tables: 6

Figures: 0

The impact of service wait times on General Practitioners' treatment of adolescent depression  
and anxiety

Bridianne O'Dea<sup>1,2</sup>

Mirjana Subotic-Kerry<sup>2</sup>

Thomas Borchard<sup>2</sup>

Belinda Parker<sup>2</sup>

Bojana Vilus<sup>2</sup>

Frank Iorfino<sup>3</sup>

Alexis E. Whitton<sup>2</sup>

Ben Harris-Roxas<sup>4</sup>

Tracey D. Wade<sup>1</sup>

Madelaine K. de Valle<sup>1</sup>

Nicholas Glozier<sup>5,6</sup>

Jennifer Nicholas<sup>7,8</sup>

Michelle Torok<sup>2,3</sup>

Taylor A. Braund<sup>2,3</sup>

Philip J. Batterham<sup>9</sup>

### **Author affiliations:**

1. Flinders University Institute for Mental Health and Wellbeing, Adelaide, South Australia, Australia.
2. Black Dog Institute, Faculty of Medicine and Health, University of New South Wales, Sydney, New South Wales, Australia.
3. Brain and Mind Centre, University of Sydney, Sydney, New South Wales, Australia
4. School of Population Health, Faculty of Medicine and Health, University of New South Wales, Sydney, New South Wales, Australia
5. Sydney Medical School, University of Sydney, Sydney, New South Wales, Australia
6. Australian Research Council Centre of Excellence for Children and Families over the Life Course
7. Centre for Youth Mental Health, University of Melbourne, Melbourne, Victoria, Australia
8. Orygen, Melbourne, Victoria, Australia
9. Centre for Mental Health Research, Australian National University, Canberra, Australian Capital Territory, Australia.

### **Corresponding author:**

Bridianne O’Dea

Flinders University Institute for Mental Health and Wellbeing, Flinders University, Adelaide, South Australia, Australia.

Email: [bridianne.odea@flinders.edu.au](mailto:bridianne.odea@flinders.edu.au)

### **Declaration of funding and/or competing interests:**

This research was supported by a generous donation from the Buxton Family Foundation, Australian Unity, the Frontiers Technology Clinical Academic Group Industry Connection Seed Funding Scheme, and the UNSW Medicine, Neuroscience, Mental Health and Addiction Theme and SPHERE Clinical Academic Group Collaborative Research Funding. BOD is supported by an NHMRC MRFF Investigator Fellowship (MRF1197249). AEW is supported by an NHMRC Investigator Fellowship (2017521). This work is supported by a NHMRC MRFF Million Minds Grant (MRF2035416).

### **Author contributions:**

BOD conceived the project and prepared all funding proposals with support from MSK, BP, AEW, BHR. BOD, BP, BHR, and TB led the development of the survey. BP, TB, MSK and EL provided research and operational support. MSK, TB, and BV analysed the data with statistical support from PJB. NG, JN, AEW, MT, TAB, and FI were chief investigators of some of the funding and provided scientific oversight. BOD and BV wrote the first draft of the manuscript with all authors providing feedback. All authors reviewed and approved the final manuscript.

## ABSTRACT

**Background:** General Practitioners (GPs) play a key role in the treatment of adolescent depression and anxiety, but their capacity to provide effective care may be compromised by long wait times.

**Aim:** To examine the treatments and recommendations of GPs for adolescent patients with depression and/or anxiety in Australia, their referral practices to specialist care and estimated wait times for these, and the perceived impact of long wait times on GPs, their patients and their treatment.

**Design, Setting and Methods:** An online survey of 192 GPs in Australia who treated adolescents (12 to 17 years old) with depression and/or anxiety.

**Results:** GPs frequently referred adolescents with depression and/or anxiety to psychologists. The estimated wait time for psychologists (M: 57 days, SD: 47.9) was four times the proposed acceptable wait time (M: 16.7 days, SD: 27.0). The frequency of medication prescribing almost doubled during the wait time when compared to routine practice (14.6% versus 8.3%, respectively). Almost all GPs (81.8%) increased their level of care due to long wait times but had limited training in youth mental health and knowledge on appropriate strategies to do so effectively.

**Conclusion:** The findings signify the discrepancies between the preferences of GPs for treatment availability in Australia and what they see as the experience for many adolescents with depression and/or anxiety who are referred to specialist care. Greater training, improved communication between referrer and referred services, and digital interventions may help GPs to reduce the negative impacts of long wait times on their adolescent patients.

**Keywords:** Primary care, General Practitioner, Mental Health Services, Adolescent

## INTRODUCTION

General Practitioners (GPs; or family physicians) are often the first source of professional help for adolescents when faced with mental health difficulties<sup>1</sup>. GPs enable diagnoses, facilitate timely access to treatment and specialists through referrals, and foster positive help-seeking attitudes and behaviours in their patients<sup>1-3</sup>. However, the rapid increase in mental health presentations in primary care due to COVID-19 pandemic has increased pressure on GPs and mental health treatment providers globally<sup>4-6</sup>. In Australia, average monthly GP visits for mental health by young people tripled throughout the pandemic and presentations for depression increased by 61%<sup>7</sup>. Psychological therapy is the first-line treatment for depression<sup>8</sup> and anxiety<sup>9</sup> in adolescents. However, wait times for psychologists often exceed three months<sup>10-14</sup>. There have also been sharp increases in disordered eating and self-harm among depressed adolescents<sup>7 15</sup>. Unsurprisingly, the capacity of GPs' to effectively treat adolescents with mental health problems has been significantly diminished by the unavailability of treatment providers<sup>16 17</sup>.

Prolonged wait times represent a period of significant clinical risk, for the treating GP and the adolescent patient because mental health symptoms are heightened but treatment has not yet begun. Longer wait times are negatively associated with every aspect of patient experience, including confidence in the care provider and the perceived quality of care<sup>18</sup>. Adolescents have reported that they engage in maladaptive coping behaviours during the wait time<sup>10</sup> while also returning more frequently to their GP<sup>14</sup>. Consequently, GPs have reported that they have had to extend the psychological care they provide to their patients, but with limited training and resources to do so effectively<sup>19</sup>. Consult durations are typically less than 20 minutes in almost all countries, further limiting the intensity of mental healthcare and support that GPs can provide<sup>20</sup>. GPs have also reported professional difficulties and discomfort when treating adolescents with complex mental health conditions, especially those

who self-harm or have suicidal ideation<sup>21 22</sup>. GPs' limited understanding of at-risk mental health states in adolescents is problematic because many young people expect GPs to initiate conversations around suicide and withhold this information until prompted<sup>23</sup>. While prior reviews have examined the effectiveness of wait time interventions administered by referred services<sup>24 25</sup>, little research has examined how GPs respond to the lack of mental health service availability for adolescents.

There is some evidence that GPs recommend lifestyle interventions such as exercise to support the self-management of mental health symptoms in their patients<sup>26</sup>. GPs have also reported increasing the active monitoring of their patients' mental health through follow-up appointments<sup>27</sup>. In some settings, GPs have utilised practice nurses who use a variety of therapeutic techniques to support the mental health of adolescent patients while they await specialist treatment<sup>28 29</sup>. GPs have also recommended digital mental health resources to help improve their patients' wellbeing and provide support outside of appointments<sup>26</sup>. Medication use is not recommended as a first-line treatment for depression or anxiety in adolescents and requires specific experience and expertise when used in this population<sup>8</sup>. However, there is evidence that GPs have increased the mental health prescribing of medications, although it is unclear whether service wait times have contributed to this<sup>30-32</sup>. Much remains unknown about the optimal treatment of depression and/or anxiety in adolescents in primary care<sup>8</sup> and there has been little research extrapolating the impact of service wait times specifically on GPs' treatment of adolescents. Understanding how to support GPs when the choice of treatment is not available may help to reduce the negative effects of long wait times on the adolescent, their family, and the GP.

### *Objectives of the current study*

Using a national cross-sectional survey, this study examined GPs' referral and recommendation practices for adolescents presenting with symptoms of depression and/or

anxiety, GPs' knowledge of wait times for their local mental health service providers and their perceptions of acceptable wait times. The survey examined the impacts of service wait times on GPs' professional capacities, their treatment decisions, and the quality of care that they provided to adolescents and their families. The survey also specifically examined GPs' attitudes towards digital resources for the self-management of adolescents' mental health during the wait time. These findings can help to inform the development of optimal treatment models for adolescent depression while also informing training initiatives to enhance GPs' professional practice and capacity to provide appropriate care to adolescents seeking professional help for their mental health.

## **METHOD**

### *Design*

This study utilised a cross-sectional national online survey conducted in Australia between May 2022 to November 2022. Ethical approval was obtained from the University of New South Wales Human Research Ethics Committee (HC220107).

### *Participants and screening*

Participants were GPs working in Australia who reported that they were treating adolescents aged between 12-17 years with symptoms of depression and/or anxiety. Participants were required to be a registered GP with the Australian Allied Health Practitioner Regulation Agency (AHPRA) and the Royal Australian College of General Practitioners or the Australian College of Rural and Remote Medicine. AHPRA numbers were verified using the national register. Other verification checks included an item where participants had to provide correct Australian Medicare Benefits Schedule (MBS) item numbers and name their Primary Health Network (PHN). A total of 837 surveys were

submitted, with 645 (77.1%) removed due to being identified as invalid, fraudulent, or duplicates ( $n=521$ ), ineligible ( $n=62$ ), incomplete ( $n=55$ ), or completed too quickly ( $n=7$ ). Fraudulent and duplicate responses were detected by comparing survey response details (i.e., email, IP addresses) and response patterns (item responses and speed of response)<sup>33</sup>. Researchers reviewed suspected fraudulent responses and discrepancies were resolved by a third rater. See Supplementary Material for more detail.

### *Recruitment and consent*

GPs were recruited through paid social media campaigns, adverts posted to GP groups on social media, articles in GP magazines, promotions at GP conferences (Sydney, May 2022), and newsletters by Australian PHNs. Adverts directed GPs to the online survey where participants were invited to review the study information and complete the consent form prior to taking part in the survey. Full legitimate responders received a 50AUD e-gift voucher.

### *Measures*

*GP characteristics.* See the Supplementary Material for more detail on survey design and the full survey. Age, gender identity, location of work (state/territory, postcode), years of experience, employment status (full-time, part-time), and number of practices worked in were collected. GPs were asked how frequently they consulted with adolescent patients (aged 12-17 years) in a typical work week; the proportion of their adolescent patient load that presented with symptoms of depression and/or anxiety; whether the proportion of their adolescent patients presenting with symptoms of depression and/or anxiety in the past 12 months had increased, remained stable/unchanged, or decreased; if they had completed any additional training in mental health and if so, had completed any training specifically in



adolescent mental health; how often parents (or equivalent) accompanied adolescent patients to the consultations.

*Referral and treatment for adolescent depression and anxiety and the impact of wait times.*

Using a 5-point Likert scale, GPs were asked to rate how often they referred or recommended a list of 19 treatments or services to adolescent patients with symptoms of depression and/or anxiety with the option to provide any other interventions not listed. GPs were then asked to estimate the approximate wait time (in days) for common mental health services in Australia. GPs were also asked to rate how acceptable they felt these estimated wait times were using a 5-point Likert scale and to nominate what they considered an acceptable service wait time. GPs were asked to report whether their practice monitored referred treatment wait times and how helpful knowledge on service wait times would be for informing their treatment decisions and referrals. GPs were asked how often they (i) referred adolescent patients to different services because the most appropriate service had lengthy wait times and (ii) increased their level of involvement in their patient's care because of lengthy wait times. Using a 5-point Likert scale, GPs were then asked to rate their agreement with a list of 16 negative outcomes of long wait times on their adolescent patients.

*Care provided to adolescent patients while waiting for referred mental health treatment.*

Using a 5-point Likert scale ranging from 'not at all' (1) to 'extremely' (5), GPs were asked to rate how important it was that they provided mental health strategies or resources to their adolescent patients while they waited for treatment. GPs were then provided with a list of 13 interventions and asked how frequently they recommended each on a 5-point Likert scale ranging from 'never' (1) to 'always' (5). GPs could specify other interventions in a free

response option. In a free response option, GPs were asked to describe the optimal intervention for adolescent patients waiting for referred mental health treatment. GPs were asked to reflect on their recent experiences of referring adolescent patients to treatment and services and rate the quality of the clinical support that they provided to their adolescent patients and their parents/guardians from ‘very poor’ (1) to ‘excellent’ (5). GPs were then asked to rate their own level of knowledge about what strategies and resources are most helpful for their adolescent patients waiting for referred treatment using a 5-point Likert scale ranging from ‘no knowledge’ (1) to ‘superior knowledge’ (5). Using a 5-point Likert scale, GPs were asked to rate how confident they were in recommending mental health smartphone applications (i.e., mobile apps) to their adolescent patients with depression and/or anxiety. GPs were also presented with a list of 14 mobile app features and asked to rate how helpful these features would be for their adolescent patients during the wait time using a 5-point Likert scale.

### *Data analyses*

The survey was administered using Qualtrics and stored on cloud storage systems hosted on UNSW servers in Australia. All statistical analyses were conducted using SPSS (version 28). Geographical area was determined using participants’ postcode and the Australian Government’s Area classification system<sup>34</sup>. Outliers for estimated wait time duration were removed if the estimate was greater than 2.5 years. Two outliers were removed. For the “select all that apply” items, percentages were calculated by dividing from the overall total number of responses. To compare routine care with wait time care, tallies for the related interventions were calculated and then collapsed appropriately (i.e., participants reporting ‘often or always’ for exercise, diet, or physical activity were collapsed into

‘lifestyle modification’ category). Free response options were examined using thematic analysis. Two independent raters reviewed all responses and disagreements were resolved by a third independent rater.

## RESULTS

### *Sample characteristics*

The sample consisted of 192 GPs. The majority were female (71.9%,  $n=138$ ), working full-time (59.9%,  $n=115$ ), based in a single practice (71.7%,  $n=137$ ) in a metropolitan area (69.3%,  $n=133$ , see Supplementary Table 1 for more detail). On average, GPs were aged 42.18 years (SD: 10.39, range: 23 to 73) and had 11.61 years of experience (SD:9.91, range 0.5-50). The majority (66.6%;  $n=128$ ) frequently treated adolescents aged 12 to 17 years in a typical working week and indicated that parents (or equivalent) were often or always (57.8%;  $n=111$ ) present in consultations. The majority also reported that the proportion of their adolescent patient load with symptoms of depression and/or anxiety was moderate (45.8%;  $n=88$ ) or high to very high (54.8%;  $n=88$ ). Nearly all GPs (79.7%;  $n=153$ ) reported that the proportion of their adolescent patients presenting with symptoms of depression and/or anxiety had increased in the past 12 months. More than half (63.5%,  $n=122$ ) had completed additional training in mental health but less than one-third (29.2%,  $n=56$ ) had training in youth mental health. Of GPs who frequently treated adolescent patients on a weekly basis ( $n=84$ ), only half (50.0%,  $n=42/84$ ) had youth mental health training.

### *Referral and treatment for adolescent depression and anxiety and the impact of wait times*

Outlined in Table 1, GPs most frequently referred their adolescent patients with symptoms of depression and/or anxiety to psychologists (92.2%). GPs also frequently

recommended ongoing GP care (87.6%), sleep hygiene (84.9%), and/or lifestyle modifications (82.3%). Two-thirds recommended mental health websites (63.5%) and over half recommended other digital resources such as smartphone apps (54.7%). In the free response, some GPs also reported recommending social, family, or peer support (12.3%), mindfulness or meditation activities (8.2%), and pursuing additional medical investigations (e.g. blood tests) (5.5%). Only one third of the GPs who frequently (i.e., often or always) prescribed medication to these adolescents (31.3%,  $n=5/16$ ) also frequently referred to psychiatrists. Of the GPs who reported any prescribing of medication (i.e., rarely, sometimes, often or always,  $n=187/192$ , 97.4%), only 22.5% ( $n=42/187$ ) often or always referred these adolescents to a psychiatrist and only 29.4% ( $n=55/187$ ) had received youth mental health training.

**Table 1. GP referrals and/or recommendations to treatments and services providers for depressive and/or anxiety symptoms in adolescents in Australia (N=192).**

| Type of treatment and/or service provider                     | Frequency        |                      |           |
|---------------------------------------------------------------|------------------|----------------------|-----------|
|                                                               | <i>n</i> (%)     |                      |           |
|                                                               | Often-<br>Always | Rarely-<br>Sometimes | Never     |
| <i>Specific health practitioner</i>                           |                  |                      |           |
| Psychologist                                                  | 177 (92.2)       | 13 (6.8)             | 2 (1.0)   |
| Ongoing appointments with GP                                  | 168 (87.6)       | 21 (10.9)            | 3 (1.6)   |
| School counsellor/psychologist                                | 83 (43.2)        | 105 (54.7)           | 4 (2.1)   |
| Other allied health care provider (excluding any listed here) | 32 (16.7)        | 138 (71.8)           | 22 (11.5) |
| Paediatrician                                                 | 22 (11.5)        | 161 (83.8)           | 9 (4.7)   |

|                                                                                   |            |            |              |
|-----------------------------------------------------------------------------------|------------|------------|--------------|
| Psychiatrist                                                                      | 22 (11.4)  | 169 (88.0) | 1 (0.5)      |
| <i>Specific service</i>                                                           |            |            |              |
| Headspace                                                                         | 76 (39.6)  | 109 (56.8) | 7 (3.6)      |
| A structured in-person therapeutic service program<br>(e.g. Cool Kids)            | 43 (22.4)  | 104 (54.1) | 45<br>(23.4) |
| Local Child and Adolescent Mental Health Services<br>(CAMHS)                      | 19 (9.9)   | 162 (84.4) | 11 (5.7)     |
| Support group (e.g., a group of people meeting to<br>share experiences)           | 18 (9.4)   | 105 (54.7) | 69<br>(35.9) |
| <i>Other</i>                                                                      |            |            |              |
| Sleep hygiene                                                                     | 163 (84.9) | 29 (15.1)  | 0 (0)        |
| Lifestyle modification (e.g., diet and/or exercise,<br>physical activity)         | 158 (82.3) | 34 (17.7)  | 0 (0)        |
| Psycho-education handouts (e.g. brochures)                                        | 63 (32.9)  | 107 (55.7) | 22<br>(11.5) |
| Medication (e.g. anti-depressants)                                                | 16 (8.3)   | 171 (89.1) | 5 (2.6)      |
| <i>Digital</i>                                                                    |            |            |              |
| Digital psychoeducation (e.g., websites)                                          | 122 (63.5) | 67 (34.9)  | 3 (1.6)      |
| Telephone helplines (e.g., Kids Helpline)                                         | 106 (55.2) | 77 (40.1)  | 9 (4.7)      |
| Digital mental health interventions (e.g. smartphone<br>apps, web-based programs) | 105 (54.7) | 76 (39.6)  | 11 (5.7)     |

Outlined in Table 2, the longest mean estimated wait times were for psychiatrists, headspace centres and psychologists. GPs in metropolitan areas reported significantly higher estimated wait times for psychiatrists (MD: +43.0 days,  $t=3.26$ ,  $df=173$ ,  $p<.001$ ) and local



|                   |                 |       |           |            |              |           |             |
|-------------------|-----------------|-------|-----------|------------|--------------|-----------|-------------|
| Psychologist      | 57.0<br>(47.9)  | 5-365 | 13 (6.8)  | 164 (86.3) | 17<br>(8.9)  | 9 (4.7)   | 16.7 (27.0) |
| Psychiatrist      | 114.1<br>(81.3) | 1-365 | 15 (7.8)  | 170 (89.0) | 12<br>(6.3)  | 9 (4.7)   | 27.7 (29.7) |
| Headspace         | 61.2<br>(77.6)  | 1-730 | 52 (27.1) | 107 (57.8) | 60<br>(31.3) | 18 (9.7)  | 13.9 (9.1)  |
| Local<br>CAMHS    | 52.0<br>(76.6)  | 0-365 | 59 (30.7) | 101 (55.8) | 53<br>(27.6) | 27 (14.9) | 12.1 (14.8) |
| Inpatient<br>unit | 35.9<br>(111.6) | 0-180 | 72 (37.5) | 60 (38.5)  | 73<br>(38.0) | 23 (14.7) | 6.6 (8.8)   |

Note: *n* varies (range: 156 to 191) for each provider/service because these questions are only asked if they endorsed referring to that provider/service.

In response to long wait times, over two-thirds of GPs (69.8%; *n*=134) reported that they often or always chose to refer to a different service and the majority (81.8%; *n*=157) often or always had to increase their level care. Shown in Table 3, almost all GPs agreed that long wait times increased adolescents' likelihood of treatment dropout (95.3%), worsened the adolescents' condition through deteriorating symptoms (92.2%), increased the risk of self-harm and suicide (90.6%), and reduced future help-seeking (90.1%). Two thirds (66.2%) agreed that wait times led to increased prescribing of mental health medication to these adolescents. GPs also noted in the free response that long wait times increased family/carer stress (10.5%), increased negative perceptions towards the healthcare system (7.3%), and increased patient costs (5.2%). Almost all GPs reported that long wait times negatively impacted their professional burden and duty of care (95.8%).

**Table 3. Level of agreement on the negative impacts of long wait times on GPs and their adolescent patients (N=192).**

|                                                             | Strongly<br>disagreed<br>or<br>disagreed | Neutral      | Strongly<br>agreed or<br>agreed |
|-------------------------------------------------------------|------------------------------------------|--------------|---------------------------------|
|                                                             | <i>n</i> (%)                             | <i>n</i> (%) | <i>n</i> (%)                    |
| <i>Impact on adolescent patients</i>                        |                                          |              |                                 |
| Increased treatment drop-out/discontinuation                | 4 (2.0)                                  | 5 (2.6)      | 183 (95.3)                      |
| Increased social withdrawal and dysfunction                 | 2 (1.0)                                  | 7 (3.6)      | 183 (95.3)                      |
| Delayed remission/recovery                                  | 1 (0.5)                                  | 8 (4.2)      | 183 (95.3)                      |
| Increased feelings of abandonment and neglect               | 1 (0.5)                                  | 11 (5.7)     | 180 (93.7)                      |
| Reduced adherence to treatment                              | 8 (4.1)                                  | 5 (2.6)      | 179 (93.2)                      |
| Greater deterioration of symptoms or illness                | 3 (1.5)                                  | 12 (6.3)     | 177 (92.2)                      |
| Greater chances of relapse                                  | 1 (0.5)                                  | 14 (7.3)     | 177 (92.2)                      |
| Exacerbated self-harm and suicide risk                      | 3 (1.5)                                  | 15 (7.8)     | 174 (90.6)                      |
| Reduced likelihood of future help-seeking                   | 3 (1.5)                                  | 16 (8.3)     | 173 (90.1)                      |
| Increased use of unhelpful coping strategies and behaviours | 1 (0.5)                                  | 19 (9.9)     | 172 (89.6)                      |
| Patients left feeling that their issues are not important   | 7 (3.6)                                  | 19 (9.9)     | 166 (86.5)                      |
| Increased school disengagement/absenteeism                  | 2 (1.0)                                  | 25 (13.0)    | 165 (85.9)                      |



|                                                 |          |           |            |
|-------------------------------------------------|----------|-----------|------------|
| Left feeling abandoned, neglected, or forgotten | 12 (6.2) | 24 (12.5) | 156 (81.2) |
| Increased use of medication                     | 19 (9.9) | 46 (24.0) | 127 (66.2) |
| <i>Impact on GPs</i>                            |          |           |            |
| Additional burden and pressure on duty of care  | 1 (0.5)  | 7 (3.6)   | 184 (95.8) |

*Recommended interventions for adolescent patients waiting for referred treatment*

Almost all GPs (95.9%;  $n=184$ ) felt it was very important to provide mental health strategies and resources to adolescent patients while they waited for treatment. Outlined in Table 4, ongoing GP appointments (89.1%), sleep hygiene (84.9%), exercise/physical activity (84.4%), mindfulness (74.5%), and diet (66.1%) were the interventions most frequently recommended by GPs to adolescent patients during the wait time. In relation to digital resources, GPs frequently recommended mental health websites, smartphone apps, telephone helplines, and online programs. In the free response, some GPs also recommended social support resources (21.1%) and relaxation activities (e.g. meditation, reading, listening to music, 19.7%).

**Table 4. Interventions recommended by GPs in Australia to help adolescents manage their mental health during the wait time (N=192).**

|  | Often or Always | Rarely or Sometimes | Never   |
|--|-----------------|---------------------|---------|
|  | $n$ (%)         | $n$ (%)             | $n$ (%) |
|  |                 |                     |         |

|                                                       |            |            |           |
|-------------------------------------------------------|------------|------------|-----------|
| <i>In-person support</i>                              |            |            |           |
| Ongoing GP appointments                               | 171 (89.1) | 21 (11.9)  | 0 (0)     |
| Referral to school service                            | 93 (48.4)  | 97 (56.3)  | 2 (1.0)   |
| Monitoring phone calls from GP or practice staff      | 21 (11.0)  | 109 (84.1) | 62 (32.3) |
| <i>Health behaviour change</i>                        |            |            |           |
| Sleep hygiene                                         | 163 (84.9) | 29 (17.0)  | 0 (0)     |
| Exercise or physical activity                         | 162 (84.4) | 30 (17.1)  | 2 (1.0)   |
| Mindfulness                                           | 143 (74.5) | 47 (27.8)  | 2 (1.0)   |
| Diet modifications                                    | 127 (66.1) | 64 (36.7)  | 1 (0.5)   |
| <i>Digital</i>                                        |            |            |           |
| Digital psychoeducation (e.g. mental health websites) | 130 (67.7) | 60 (35.1)  | 2 (1.0)   |
| Web-based mental health programs or services          | 97 (50.6)  | 88 (55.9)  | 7 (3.6)   |
| Mental health smartphone apps                         | 106 (55.2) | 67 (43.0)  | 19 (9.9)  |
| Telephone helplines (e.g., Kids Helpline)             | 100 (52.1) | 75 (46.7)  | 7 (3.6)   |
| <i>Other</i>                                          |            |            |           |
| Psycho-education handouts (e.g. brochures)            | 85 (44.3)  | 92 (61.8)  | 15 (7.8)  |
| Medication prescribing (e.g. anti-depressants)        | 28 (14.6)  | 158 (82.3) | 6 (3.1)   |

As shown in Table 5, many of the interventions recommended by GPs for use during the wait time were interventions already used by GPs in routine care, with some exceptions. The frequency of self-reported medication prescribing almost doubled during the wait time when compared to routine practice (14.6% versus 8.3%, respectively). Only 29.6% ( $n=55/186$ ) of the GPs who reported any prescribing of medication during the wait time (i.e.,

rarely, sometimes, often or always,  $n=186/192$ , 96.7%) had received training specifically in youth mental health. There was also more frequent use of digital mental health interventions (+10.4%) and psycho-education handouts (+11.4%) by GPs during the wait time.

**Table 5. A comparison of the interventions often or always recommended by GPs in routine care for adolescent depression and/or anxiety with those often or always recommended to help adolescents manage their mental health during the wait time (N=192).**

| Type of intervention                                                           | Often or always recommended by GPs in routine care for adolescent depression and/or anxiety<br><i>n</i> (%) | Often or always recommended by GPs to help adolescents manage during the wait time<br><i>n</i> (%) |
|--------------------------------------------------------------------------------|-------------------------------------------------------------------------------------------------------------|----------------------------------------------------------------------------------------------------|
| Ongoing appointments with GP                                                   | 168 (87.6)                                                                                                  | 171 (89.1)                                                                                         |
| Sleep hygiene                                                                  | 163 (84.9)                                                                                                  | 163 (84.9)                                                                                         |
| Lifestyle modification (e.g., diet and/or exercise, physical activity)         | 158 (82.3)                                                                                                  | 162 (84.3)                                                                                         |
| Digital psychoeducation (e.g. mental health websites)                          | 122 (63.5)                                                                                                  | 130 (67.7)                                                                                         |
| Digital mental health interventions (e.g. smartphone apps, web-based programs) | 105 (54.7)                                                                                                  | 125 (65.10)                                                                                        |
| Telephone helplines (e.g., Kids Helpline)                                      | 106 (55.2)                                                                                                  | 100 (52.1)                                                                                         |

|                                                |           |           |
|------------------------------------------------|-----------|-----------|
| School counsellor/psychologist                 | 83 (43.2) | 93 (48.4) |
| Psycho-education handouts (e.g. brochures)     | 63 (32.9) | 85 (44.3) |
| Medication prescribing (e.g. anti-depressants) | 16 (8.3)  | 28 (14.6) |

Most of the GPs described their knowledge of appropriate strategies and resources for the wait time as adequate (47.9%;  $n=92$ ) or basic (38.0%;  $n=73$ ) and most rated the quality of clinical support that they provided to adolescents during the wait time as fair (35.4%;  $n=68$ ) or good (50.0%;  $n=96$ ). Only 6.8% ( $n=13$ ) rated the care they provided as excellent. Similar findings were reported for the quality of care provided to parents (or equivalent) (fair: 43.8%;  $n=84$ , good: 41.1%;  $n=79$ , excellent: 5.2%,  $n=10$ ).

When asked to describe the optimal intervention for adolescents waiting for referred mental health treatment, GPs suggested ongoing GP appointments (30.7%), digital interventions (28.1%), lifestyle modifications (14.6%), multi-disciplinary support from other mental health or allied health professionals (13.5%) and check-ins (13.0%). Half of the GPs (53.2%,  $n=102$ ) reported that they were fairly or completely confident in recommending mobile apps to adolescents with depression and/or anxiety, with 30.2% ( $n=58$ ) somewhat confident, and 16.7% ( $n=32$ ) only slightly or not at all confident. As shown in Table 6, mobile apps that focused on sleep, suicide safety planning, or psychoeducation, were rated by GPs to be the most helpful for supporting adolescents' mental health during the wait time. The top three apps recommended by GPs to their adolescent patients with depression and/or anxiety were *Smiling Mind* ( $n=53$ , 27.6%), *Headspace* ( $n=32$ , 16.7%) and *Calm* ( $n=21$ , 10.9%, see Supplementary Material for full list).

**Table 6. The mobile app features rated by GPs to be the most helpful to supporting adolescents’ mental health during the wait time.**

| App features                                                                                                               | Not at all helpful |     | Slightly-moderately helpful |      | Very-extremely helpful |      |
|----------------------------------------------------------------------------------------------------------------------------|--------------------|-----|-----------------------------|------|------------------------|------|
|                                                                                                                            | <i>n</i>           | %   | <i>n</i>                    | %    | <i>n</i>               | %    |
| Helps improve a young person’s sleep                                                                                       | 0                  | 0   | 48                          | 25.0 | 144                    | 75.0 |
| Provides safety planning for suicidality and self-harm                                                                     | 2                  | 1   | 51                          | 26.6 | 139                    | 72.4 |
| Provides psychoeducation about depression and anxiety                                                                      | 1                  | 0.5 | 53                          | 27.6 | 138                    | 71.9 |
| Delivers mindfulness strategies or meditation skills (e.g. breathing exercises, relaxation techniques)                     | 1                  | 0.5 | 58                          | 30.2 | 133                    | 69.3 |
| Provides self-directed psychological therapy to reduce negative thinking (e.g. Cognitive Behavioural Therapy)              | 0                  | 0   | 60                          | 31.2 | 132                    | 68.7 |
| Connects the young person directly with the referred healthcare provider (e.g. updates on upcoming appointment, reminders) | 1                  | 0.5 | 60                          | 31.2 | 131                    | 68.3 |
| Helps a young person improve their relationships and social functioning                                                    | 3                  | 1.6 | 59                          | 30.7 | 130                    | 67.7 |
| Helps a young person focus on resilience and personal strengths (e.g. Positive Psychology)                                 | 0                  | 0   | 64                          | 33.4 | 128                    | 66.6 |

|                                                                                                                    |   |     |    |      |     |      |
|--------------------------------------------------------------------------------------------------------------------|---|-----|----|------|-----|------|
| Helps improve communication and self-disclosure skills                                                             | 1 | 0.5 | 65 | 33.9 | 126 | 65.7 |
| Helps increase a young person's physical activity                                                                  | 2 | 1   | 67 | 34.9 | 123 | 64.0 |
| Provides self-tracking tools for medication reminders and physical exercise                                        | 2 | 1   | 78 | 40.6 | 112 | 58.3 |
| Provides mood tracking to build emotional awareness                                                                | 1 | 0.5 | 80 | 41.7 | 111 | 57.8 |
| Encourages journaling and personal reflection                                                                      | 1 | 0.5 | 88 | 45.8 | 103 | 53.7 |
| Provides moderated peer support for young people to build support and connect with others with similar experiences | 5 | 2.6 | 86 | 44.8 | 101 | 52.7 |

## DISCUSSION

This survey explored GPs' first-line treatments and recommendations for adolescents with depression and/or anxiety in Australia, their referral practices to specialist care and estimated wait times for these, and the perceived impact of long wait times on GPs, their patients, and their treatment. GPs reported that they most frequently referred adolescents with depression and/or anxiety to psychologists while also recommending lifestyle interventions. These practices are consistent with Australia's clinical guidelines<sup>8,9,35</sup> and the default referral pathways reported by GPs in prior research<sup>28,36</sup>. The participating GPs estimated that adolescents waited two months to access a psychologist and wait times did not differ between geographical areas. The mean estimated wait time for psychologists was four times longer than the proposed acceptable wait time but lower than the three-month average reported by Australian adolescents during the same period<sup>14</sup>. Only 1 in 4 GPs who frequently prescribed

mental health medication to adolescents with depression and/or anxiety also frequently referred to psychiatrists. The estimated wait time for psychiatrists was three times longer than the proposed acceptable wait time. These findings signify the discrepancies between GPs' preferences for treatment availability in Australia and what they see as the experience of many adolescents with depression and/or anxiety who are referred to specialist care.

Our findings indicate that many GPs in Australia may lack the expertise required to expertly treat depression and/or anxiety in adolescents<sup>8</sup> despite seeing these patients regularly<sup>21</sup>. Only half of the GPs who frequently treated adolescents had training in youth mental health. Most GPs who prescribed mental health medications had no training in youth mental health and had not referred to psychiatrists. Although lifestyle interventions for depression are included in clinical guidelines<sup>8</sup>, it remains unclear whether GPs were carefully assessing the suitability of these for adolescents. Prior research has found that physical activity interventions are the least preferred brief intervention among adolescent help-seekers<sup>37</sup>. Given the increased prevalence of disordered eating in adolescents and its comorbidity with depression<sup>7</sup>, improving GPs' use of screening tools for disordered eating may help to ensure that any diet and exercise advice focuses on functional nutrition and movement rather than weight loss. There is also evidence that brief digital psychological interventions targeting depression can also be effective for reducing dietary restriction and GPs may need more targeted support in identifying which adolescents would benefit from these interventions<sup>38</sup>. Future research should work with GPs to devise training initiatives to increase their knowledge of how to adhere to clinical guidelines and recommend effective interventions with greater precision. This will ensure greater alignment between adolescents' treatment needs, their preferences, and their capacity to implement recommendations made by GPs.

GPs agreed that long wait times exacerbated the poor mental health of adolescents, and that they had an instrumental role in supporting their patients' mental health during the wait time. These findings are consistent with the viewpoints of Australian adolescents<sup>14</sup>. However, many of the interventions recommended by GPs for use during the wait time were the same interventions recommended in routine care. This suggests that GPs may not be introducing strategies and supports to meet the specific needs of adolescents while they waited for treatment. While it may be possible that some GPs accounted for long wait times in routine treatment decisions, this is unlikely given that almost all GPs had little knowledge of wait times or wait time-specific strategies. However, one notable change in treatment emerged. Many GPs agreed that long wait times increased their prescribing of mental health medication to adolescents and the frequency of medication use in the wait time was almost double the frequency of use in routine care. This increase is consistent with prior research<sup>10</sup> and is concerning because most of the participating GPs did not report the expertise needed to appropriately prescribe antidepressants to this age group<sup>8</sup>. Future research should confirm this treatment pattern using objective data, given that antidepressant prescribing in Australia has already been found to be inconsistent with clinical guidance<sup>39</sup>. In relation to digital resources, many GPs were already recommending apps to adolescents, although none of the commonly recommended apps targeted the domains that GPs believed would be most useful during the wait time (i.e., sleep, suicide safety planning, and psychoeducation). Furthermore, none of the commonly recommended apps were designed specifically for adolescents and only one had been clinically evaluated in adolescents aged 12 to 17 years. Future research should examine whether GPs' suggestions for smartphone apps during the wait time align with the needs and expectations of adolescents, given that many teens have previously reported receiving unhelpful levels of support from professionals during the wait time<sup>10 14</sup>.



This study confirmed that greater knowledge of service availability among GPs may help them to direct referrals more appropriately. Fostering greater dialogue and collaboration between the professionals making and accepting referrals can help to improve timely access to treatment by helping to (i) identify the professionals who are available within an acceptable period and (ii) ensure that the adolescents do indeed qualify for the referred service<sup>21</sup>. Information-sharing between local psychologists and GPs on who can accept new referrals should be prioritised, given that many psychologists have been at capacity since the pandemic<sup>40</sup>. Digital referral systems have also been found to enable greater real-time tracking of service capacity at a localised level when compared to paper-based referrals<sup>41 42</sup>. Digital systems that incorporate validated screening tools can also ensure that adolescents are indeed waiting for the right treatment provider. Many teens do not verbally disclose behaviours or co-morbid symptoms that represent higher risk (e.g. self-harm, disordered eating, psychosis, or substance misuse) and require a specific treatment<sup>22</sup>. Digital systems for mental health have already been shown to be acceptable to GPs<sup>43</sup>, increase patients' uptake of low intensity interventions for depression<sup>44</sup>, and enable smarter service planning and co-ordination of care when integrated and utilised<sup>45 46</sup>. The Australian Government has implemented a new digital Initial Assessment and Referral Decision Support Tool (IAR-DST) in general practices to provide a standardised, objective approach to the assessment and treatment of mental health conditions<sup>47</sup>. This tool has recently been adapted for use in adolescents. Future research should examine GPs' uptake and the utility of the IAR-DST for improving referrals and treatment precision for adolescent depression and/or anxiety in Australia. Future research should also target psychologists and other treatment providers with long wait times to examine how often they see adolescents after a long wait who could have been referred to a more appropriate provider or one with less wait, and whether there are

specific case presentations or help-seeking profiles that are more likely to be on unhelpful referral pathways.

Most of the participating GPs reported that they had increased their professional involvement in their patients' mental healthcare due to long wait times and this had a negative impact on their professional wellbeing. This is consistent with prior research, where many GPs have described themselves as "ethically stressed and frustrated" when unable to adequately manage the mental health needs of their patients<sup>48</sup>. Future work may benefit from exploring how professional support for GPs can be strengthened when adolescents are experiencing significant treatment delays. Future work on devising optimal models of care for adolescents during the wait time should prioritise approaches that strengthen GPs' professional capacities but also account for GPs being time poor. While the Australian IAR-tool is designed to assist GPs in their decision-making, this tool does not enable streamlined or triaged remote patient monitoring of patients' mental health and risk<sup>47</sup>. It may also limit GPs' capacities to adequately identify individual needs given its strong focus on standardisation. Use of the tool will likely be low if GPs find that its recommendations are too generalised. Future work on designing optimal models of wait time care should also integrate family carers as additional supports, given that they often accompany adolescents to GP consults. Family carers are often under-utilised by GPs despite being immediately available to adolescents<sup>49</sup>. However, prior research has demonstrated that family carers have their own preferences for wait time care<sup>50</sup>. Future work should endeavour to bring GPs, adolescents, and their carers together to design a cooperative approach that not only meets the psychological needs of adolescents while they wait but also strengthens family support and the capacity of GPs to provide high quality care.

### *Limitations*

This study is the first to examine the impact of wait times on GPs' treatment and referral patterns for adolescent mental health in Australia. The study may not adequately represent the diversity of GPs across Australia or capture the full spectrum of challenges or treatment practices used by GPs due to the small sample size. Given the self-report nature of this study, future studies should aim to incorporate objective or patient-reported data to validate some of the patterns that emerged in our findings. Although our findings are also generally consistent with cross-national data, different results may be found in other countries with different healthcare systems or funding models. Future research should explore other patient characteristics or profiles that may be at greater risk of negative effects during the wait time, such as developmental needs, socio-economic disadvantage and parental separation<sup>51</sup>. Additionally, qualitative methods, such as semi-structured interviews, may provide a richer scope of understanding of the impact of wait times on GPs and their rationale for treatment selection<sup>36</sup>.

### *Conclusion*

This study highlights the significant impact and challenges that GPs in Australia experience due to prolonged wait times for adolescent mental health services. Broader efforts to reduce service wait times must continue, particularly for psychologists and psychiatrists. Our findings further confirm the need for specialised professional development and training in adolescent mental health for GPs in Australia<sup>21</sup>. GPs would also benefit from greater knowledge and training of targeted strategies for supporting adolescents' psychological wellbeing during the wait time. Other recommendations include improving the communication and collaboration between primary care and referred services, more effectiveness studies on mobile apps for the self-management of mental health during the

wait time and greater utilisation of family carers during the wait time. Future research should prioritise brief, low-intensity support options for GPs that build cooperation between adolescents, carers, and GPs to ensure that GPs' workloads are not further burdened by lack of service availability. Further research in this area will help to enhance the positive and protective help-seeking relationships between GPs and adolescents.

## References

1. MacDonald K, Fainman-Adelman N, Anderson KK, et al. Pathways to mental health services for young people: a systematic review. *Soc Psychiatry Psychiatr Epidemiol* 2018;53(10):1005-38. doi: 10.1007/s00127-018-1578-y
2. Lawrence SM, Saab MM, Savage E, et al. Adolescents' perspectives and experiences of accessing general practitioner services: A systematic review. *J Child Health Care* 2024;0(0):13674935241239837. doi: 10.1177/13674935241239837
3. Crouch L, Reardon T, Farrington A, et al. "Just keep pushing": Parents' experiences of accessing child and adolescent mental health services for child anxiety problems. *Child Care Health Dev* 2019;45(4):491-99. doi: 10.1111/cch.12672
4. Russell MJ, Urichuk L, Parker N, et al. Youth mental health care use during the COVID-19 pandemic in Alberta, Canada: an interrupted time series, population-based study. *Child Adolesc Psychiatry Ment Health* 2024;18(1):101. doi: 10.1186/s13034-024-00785-1
5. Daneshmand R, Acharya S, Zelek B, et al. Changes in Children and Youth's Mental Health Presentations during COVID-19: A Study of Primary Care Practices in Northern Ontario, Canada. *Int J Environ Res Public Health* 2023;20(16):6588.
6. Villas-Boas SB, Kaplan S, White JS, et al. Adolescent Total and Mental Health-Related Emergency Department Visits During the COVID-19 Pandemic. *JAMA Netw Open* 2023;6(10):e2336463. doi: 10.1001/jamanetworkopen.2023.36463
7. John JR, Khan JR, Lin PI, et al. A nationwide study of COVID-19 impact on mental health-related presentations among children and adolescents to primary care practices in Australia. *Psychiatry Res* 2023;326:115332. doi: 10.1016/j.psychres.2023.115332

8. Malhi GS, Bell E, Bassett D, et al. The 2020 Royal Australian and New Zealand College of Psychiatrists clinical practice guidelines for mood disorders. *Aust N Z J Psychiatry* 2021;55(1):7-117. doi: 10.1177/0004867420979353
9. Andrews G, Bell C, Boyce P, et al. Royal Australian and New Zealand College of Psychiatrists clinical practice guidelines for the treatment of panic disorder, social anxiety disorder and generalised anxiety disorder. *Aust N Z J Psychiatry* 2018;52(12):1109-72. doi: 10.1177/0004867418799453
10. Punton G, Dodd AL, McNeill A. 'You're on the waiting list': An interpretive phenomenological analysis of young adults' experiences of waiting lists within mental health services in the UK. *PLoS One* 2022;17(3):e0265542. doi: 10.1371/journal.pone.0265542
11. Kowalewski K, McLennan JD, McGrath PJ. A preliminary investigation of wait times for child and adolescent mental health services in Canada. *J Can Acad Child Adolesc Psychiatry* 2011;20(2):112-9.
12. Edbrooke-Childs J, Deighton J. Problem severity and waiting times for young people accessing mental health services. *BJPsych Open* 2020;6(6):e118. doi: 10.1192/bjo.2020.103
13. McNicholas F, Kelleher I, Hedderman E, et al. Referral patterns for specialist child and adolescent mental health services in the Republic of Ireland during the COVID-19 pandemic compared with 2019 and 2018. *BJPsych Open* 2021;7(3):e91. doi: 10.1192/bjo.2021.48
14. Subotic-Kerry M, Borchard T, Parker B, et al. While they wait: A cross-sectional survey on wait times for mental health treatment for anxiety and depression for Australian adolescents. *medRxiv* 2023:23294348. doi: 10.1101/2023.08.21.23294348

15. Trafford AM, Carr MJ, Ashcroft DM, et al. Temporal trends in eating disorder and self-harm incidence rates among adolescents and young adults in the UK in the 2 years since onset of the COVID-19 pandemic: a population-based study. *Lancet Child Adolesc Health* 2023;7(8):544-54. doi: 10.1016/s2352-4642(23)00126-8
16. Paton K, Gillam L, Warren H, et al. Clinicians' perceptions of the Australian Paediatric Mental Health Service System: Problems and solutions. *Aust N Z J Psychiatry* 2021;55(5):494-505. doi: 10.1177/0004867420984242
17. Petrie K, Baldwin P, Crawford J, et al. The voice of mental health practice in Australia: a mixed-method cross-sectional study of gaps and areas of need. *Aust N Z J Public Health* 2021;45(4):318-24. doi: 10.1111/1753-6405.13078
18. Bleustein C, Rothschild DB, Valen A, et al. Wait times, patient satisfaction scores, and the perception of care. *Am J Manag Care* 2014;20(5):393-400.
19. De Silva T, Prakash A, Yarlagadda S, et al. General practitioners' experiences and perceptions of mild moderate depression management and factors influencing effective service delivery in rural Australian communities: a qualitative study. *Int J Ment Health Syst* 2017;11:54. doi: 10.1186/s13033-017-0159-x
20. Irving G, Neves AL, Dambha-Miller H, et al. International variations in primary care physician consultation time: a systematic review of 67 countries. *BMJ Open* 2017;7(10):e017902. doi: 10.1136/bmjopen-2017-017902
21. Smith O, Bergmann J, Schall U. Youth mental health competencies in regional general practice. *Australas Psychiatry* 2021;29(2):129-33. doi: 10.1177/1039856220970058
22. Kehoe M, Winton-Brown T, Lee S, et al. General Practitioners' management of young people with mental health conditions in Australia. *Early Interv Psychiatry* 2020;14(1):124-29. doi: 10.1111/eip.12892

23. Osborne D, De Boer K, Meyer D, et al. Raising Suicide in Medical Appointments- Barriers and Facilitators Experienced by Young Adults and GPs: A Mixed-Methods Systematic Review. *Int J Environ Res Public Health* 2023;20(1) doi: 10.3390/ijerph20010822
24. Valentine AZ, Hall SS, Sayal K, et al. Waiting-list interventions for children and young people using child and adolescent mental health services: a systematic review. *BMJ Ment Health* 2024;27(1) doi: 10.1136/bmjment-2023-300844
25. Eichstedt JA, Turcotte K, Golden G, et al. Waitlist management in child and adolescent mental health care: A scoping review. *Child Youth Serv Rev* 2024;160:107529. doi: 10.1016/j.chilyouth.2024.107529
26. Keyes B, McCombe G, Broughan J, et al. Enhancing GP care of mental health disorders post-COVID-19: a scoping review of interventions and outcomes. *Ir J Psychol Med* 2023;40(3):470-86. doi: 10.1017/ipm.2022.17
27. Budd M, Iqbal A, Harding C, et al. Mental health promotion and prevention in primary care: What should we be doing vs. what are we actually doing? *Mental Health and Prevention* 2021;21 doi: 10.1016/j.mhp.2020.200195
28. Koet LB, de Schepper EI, Bohnen AM, et al. Anxiety problems in children and adolescents: a population-based cohort study on incidence and management in Dutch primary care. *Br J Gen Pract* 2022;72(719):e405-e12. doi: 10.3399/bjgp.2021.0557
29. Koet LBM, Gerger H, Jansen W, et al. Evaluation of practice nurses' management of paediatric psychosocial problems in general practice. *J Public Health* 2024;46(2):e261-e68. doi: 10.1093/pubmed/fdae008
30. Ball WP, Black C, Gordon S, et al. Inequalities in children's mental health care: analysis of routinely collected data on prescribing and referrals to secondary care. *BMC Psychiatry* 2023;23(1):22. doi: 10.1186/s12888-022-04438-5



31. Cao TXD, Fraga LFC, Fergusson E, et al. Prescribing Trends of Antidepressants and Psychotropic Coprescription for Youths in UK Primary Care, 2000-2018. *J Affect Disord* 2021;287:19-25. doi: 10.1016/j.jad.2021.03.022
32. Jack RH, Hollis C, Coupland C, et al. Incidence and prevalence of primary care antidepressant prescribing in children and young people in England, 1998-2017: A population-based cohort study. *PLoS Med* 2020;17(7):e1003215. doi: 10.1371/journal.pmed.1003215
33. Cobanoglu C, Cavusoglu, M., & Turktarhan, G. . A beginner's guide and best practices for using crowdsourcing platforms for survey research: The Case of Amazon Mechanical Turk (MTurk). *JGBI* 2021;6(1):92-97.
34. Australian Bureau of Statistics. Remoteness Areas (2021 to 2026), 2021.
35. Orygen. Clinical Practice Guideline: Treating depression in young people Guidance, resources and tools for assessment and management: Orygen - The National Centre of Excellence in Youth Mental Health. 2017.
36. Stallman A, Sheeran N, Boschen M. A Qualitative Exploration of General Practitioners' Treatment Decision-Making for Depressive Symptoms. *Med Decis Making* 2023;43(4):498-507. doi: 10.1177/0272989x231166009
37. Schley C, Pace N, Mann R, et al. The headspace Brief Interventions Clinic: Increasing timely access to effective treatments for young people with early signs of mental health problems. *Early Interv Psychiatry* 2019;13(5):1073-82. doi: 10.1111/eip.12729
38. Schleider JL, Mullarkey MC, Fox KR, et al. A randomized trial of online single-session interventions for adolescent depression during COVID-19. *Nat Hum Behav* 2022;6(2):258-68. doi: 10.1038/s41562-021-01235-0
39. Wallis KA, Donald M, Moncrieff J. Antidepressant prescribing in general practice: A call to action. *Aust J Gen Pract* 2021;50(12):954-56. doi: 10.31128/ajgp-02-21-5828

40. Australian Psychological Society. 1 in 3 psychologists are unable to see new clients, but Australians need help more than ever. 2022. <https://psychology.org.au/for-members/news-and-updates/news/2022/australians-need-psychological-help-more-than-ever>.
41. Kern C, Fu DJ, Kortuem K, et al. Implementation of a cloud-based referral platform in ophthalmology: making telemedicine services a reality in eye care. *Br J Ophthalmol* 2020;104(3):312-17. doi: 10.1136/bjophthalmol-2019-314161
42. Azamar-Alonso A, Costa AP, Huebner LA, et al. Electronic referral systems in health care: a scoping review. *Clinicoecon Outcomes Res* 2019;11:325-33. doi: 10.2147/ceor.S195597
43. Parker BL, Achilles MR, Subotic-Kerry M, et al. Youth StepCare: a pilot study of an online screening and recommendations service for depression and anxiety among youth patients in general practice. *BMC Fam Pract* 2020;21(1):2. doi: 10.1186/s12875-019-1071-z
44. Whitton AE, Hardy R, Cope K, et al. Mental Health Screening in General Practices as a Means for Enhancing Uptake of Digital Mental Health Interventions: Observational Cohort Study. *J Med Internet Res* 2021;23(9):e28369. doi: 10.2196/28369
45. Capon W, Hickie IB, McKenna S, et al. Characterising variability in youth mental health service populations: A detailed and scalable approach using digital technology. *Australas Psychiatry* 2023;31(3):295-301. doi: 10.1177/10398562231167681
46. Iorfino F, Piper SE, Prodan A, et al. Using Digital Technologies to Facilitate Care Coordination Between Youth Mental Health Services: A Guide for Implementation. *Front Health Serv* 2021;1:745456. doi: 10.3389/frhs.2021.745456
47. Department of Health and Aged Care. Initial Assessment and Referral Decision Support Tool – IAR Decision Support Tool. Australian Government, 2019.

48. Kappelin C, Sandlund C, Westman J, et al. Dancing with the patient: a qualitative study of general practitioners' experiences of managing patients with multimorbidity and common mental health problems. *BMC Prim Care* 2023;24(1):104. doi: 10.1186/s12875-023-02056-y
49. Cronin M, McLoughlin K, Foley T, et al. Supporting family carers in general practice: a scoping review of clinical guidelines and recommendations. *BMC Primary Care* 2023;24(1):234. doi: 10.1186/s12875-023-02188-1
50. Cunningham CE, Chen Y, Deal K, et al. The Interim Service Preferences of Parents Waiting for Children's Mental Health Treatment: A Discrete Choice Conjoint Experiment. *J Abnorm Child Psychol* 2013;41(6):865-77. doi: 10.1007/s10802-013-9728-x
51. Boulton KA, Hodge A, Levu K, et al. Access and barriers to supports for children and caregivers attending public child developmental assessment services: Findings from the Sydney child neurodevelopment research registry. *Autism Res* 2024;17(3):555-67. doi: 10.1002/aur.3064
